# Supplementary material for: The impact of tumor profiling approaches and genomic data strategies for cancer precision medicine
Source: PubMed Central journal article supplement (PMC4962446; doi:10.1186/s13073-016-0333-9), 2016-07-26

Supplementary Figure 1

Colon

A

Matched

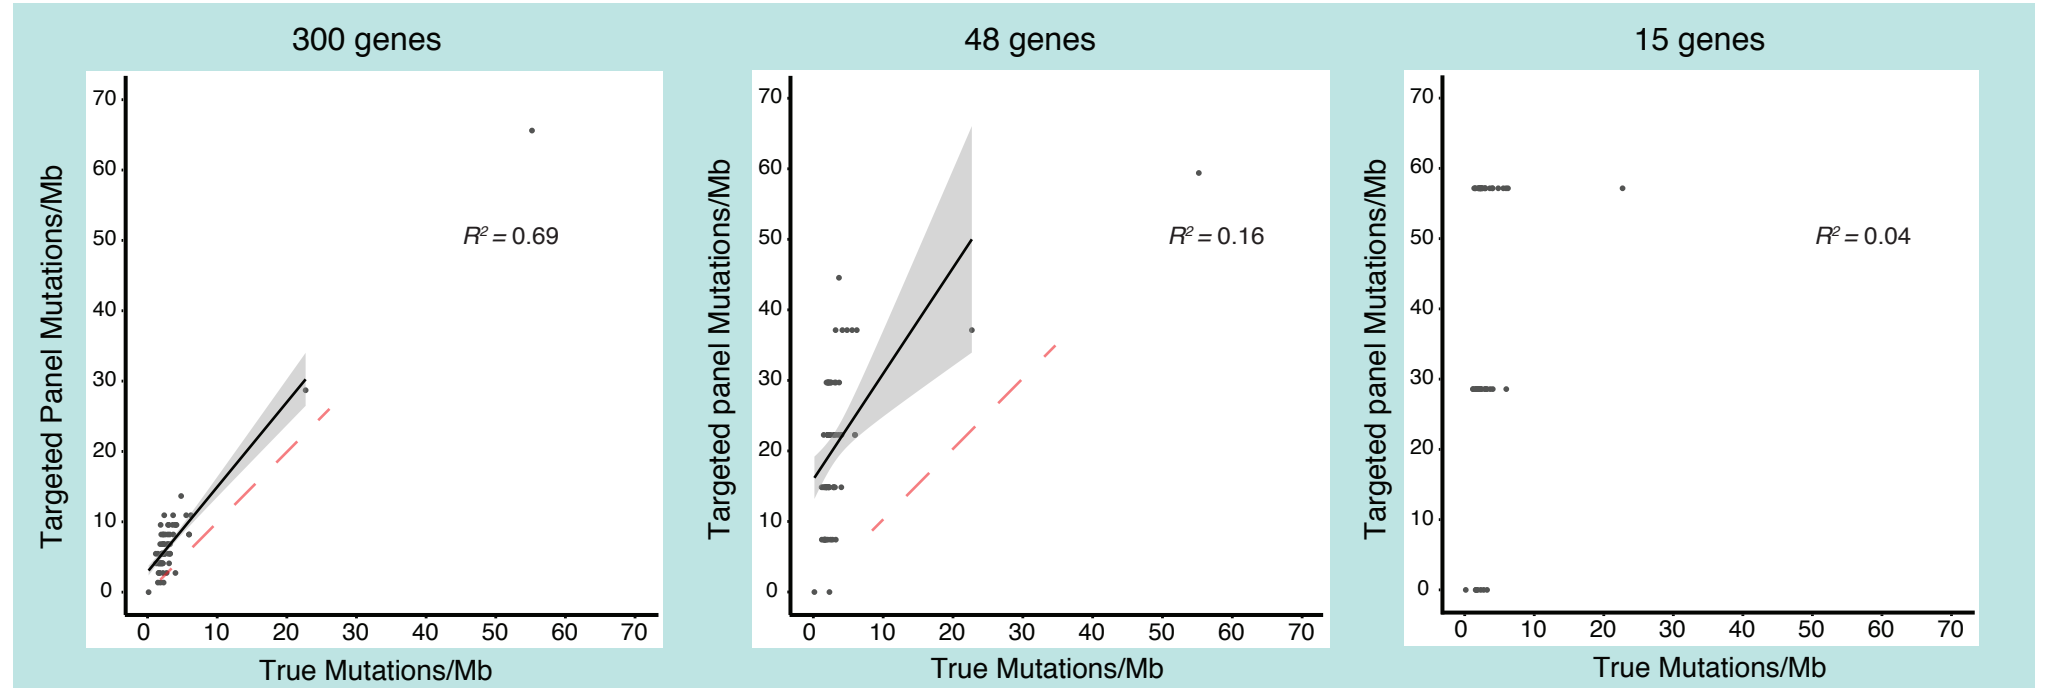

B

Unmatched

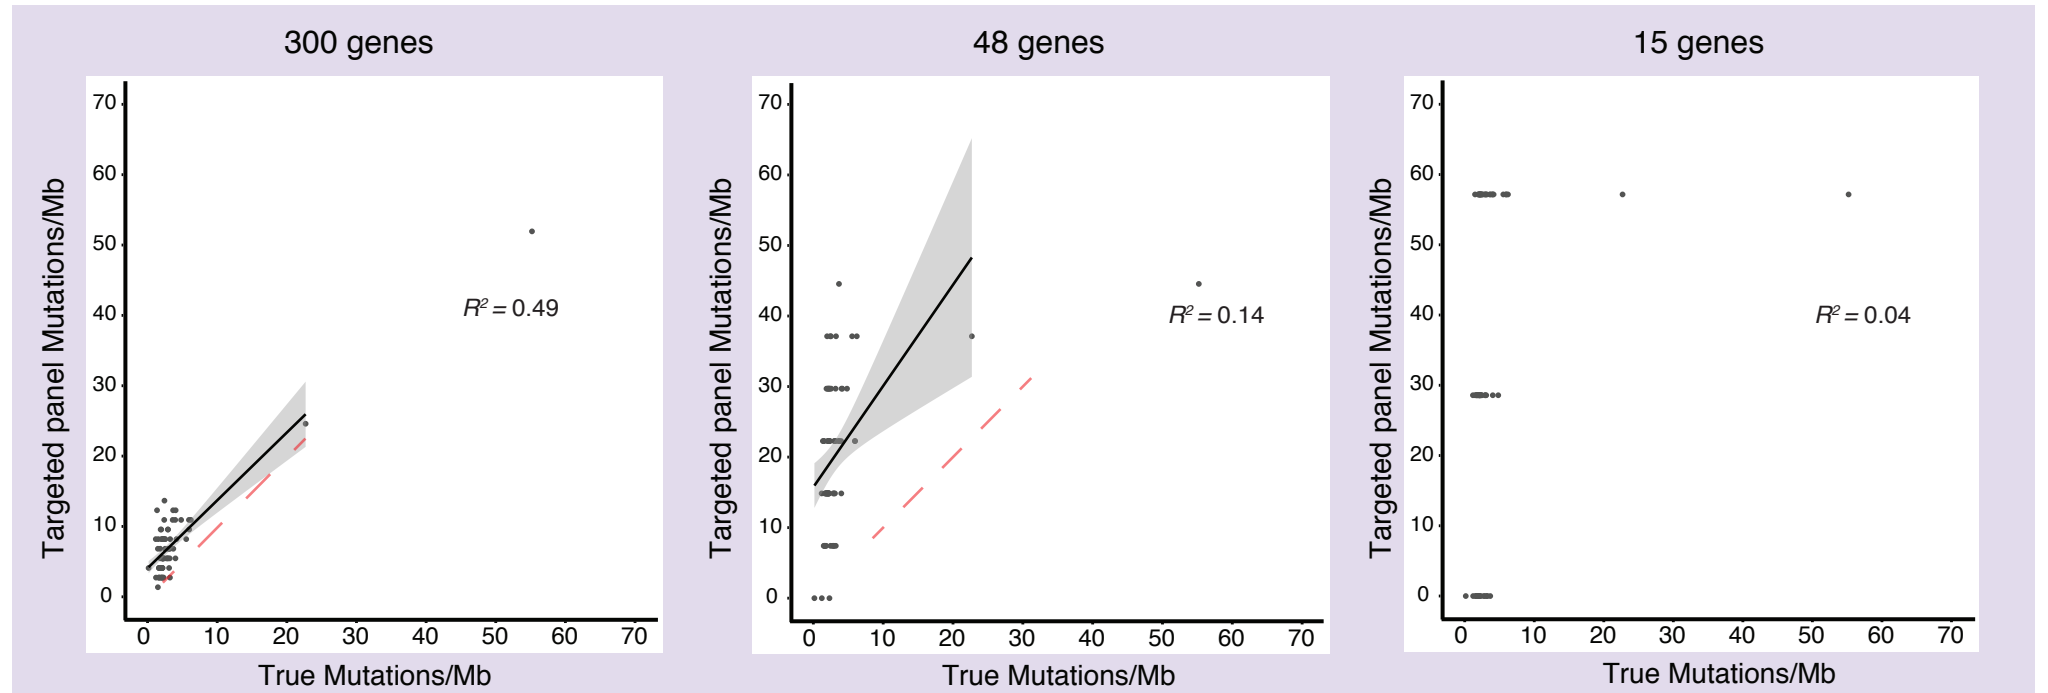

Supplement: 13073_2016_333_MOESM8_ESM.pdf [file 13073_2016_333_MOESM8_ESM.pdf]
